# Supplementary material for: Influence of anions and solvent molecules on the packing and emission spectra of coordination polymers based on silver ions and an anthracene derivative
Source: Royal Society of Chemistry journal article supplement (doi:10.1039/c7ce00846e), 2017-01-01
Supplement: c7ce00846e1.pdf [file c7ce00846e1.pdf]

# Influence of Anions and Solvent Molecules on the Packing and Emission Spectra of Coordination Polymers Based on Silver ions and an Anthracene Derivative

Jing Chen <sup>a</sup>, Noémie Voutier<sup>a</sup>, Jamshid Rajabi<sup>a</sup>, Aurélien Crochet<sup>b</sup>, Dario M. Bassani<sup>c</sup> and Katharina M. Fromm<sup>\*a</sup>

<sup>a</sup> Department of Chemistry, University of Fribourg, Chemin du Musée 9, CH-1700 Fribourg, Switzerland. Fax: 41 263009738; Tel: 41 3008732; E-mail: Katharina.Fromm@unifr.ch

<sup>b</sup> Fribourg Center for Nanomaterials, University of Fribourg, Chemin du Musée 9, CH-1700 Fribourg, Switzerland.

<sup>c</sup> Institut des Sciences Moléculaires CNRS UMR5255, Univ. Bordeaux, 351, Cours de la Libération, 33400 Talence (France).

## Supplementary materials

### Table of content:

Fig S1: ORTEP plot of **1**, ellipsoids draw at 35 % of probability; #1: 1-x, 1-y, 1-z; #2: 1+x, 1+y, 1+z; H atoms are omitted for clarity.

Fig S2: ORTEP plot of **2**, ellipsoids draw at 50 % of probability; #1: 3-x, 2-y, 1-z; #2: -2+x, -2+y, -1+z; some H atoms are omitted for clarity.

Fig S3: ORTEP plot of **3**, ellipsoids draw at 50 % of probability; #1: -x, 1-y, 2-z; #2: x, y, 1+z; some H atoms are omitted for clarity.

Fig S4: ORTEP plot of **4**, ellipsoids draw at 35 % of probability; #1: 1-x, -y, -z; #2: -1+x, -1+y, -1+z; some H atoms are omitted for clarity.

Fig S5: ORTEP plot of **5**, ellipsoids draw at 35 % of probability; #1: 1/2-x, -3/2-y, -z; #2: 1+x, y, 3/2-z; #3: 1-x, -y, 1-z, #4: x, -y, -1/2+z; H atoms are omitted for clarity.

Fig S6. Packing in the crystal structure of **5**; H atoms are omitted for clarity.

Fig S7. Packing in the crystal structure of **5** showing the weak interactions between adjacent anthracene moieties; H atoms are omitted for clarity.

Fig S8. Upper view of the stacking in the crystal structure of **1** to **4** showing the overlays between adjacent anthracene moieties; Centroids are represented by the black point at the center of each anthracene; H atoms are omitted for clarity.

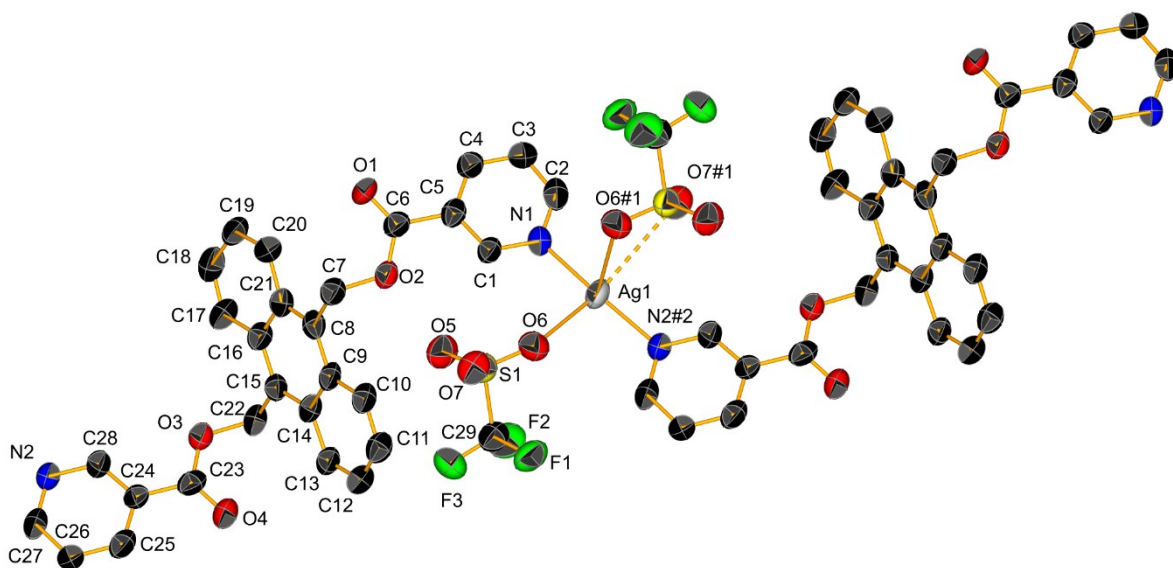

Fig S1: ORTEP plot of 1, ellipsoids draw at 35 % of probability; #1: 1-x, 1-y, 1-z; #2: 1+x, 1+y, 1+z; H atoms are omitted for clarity.

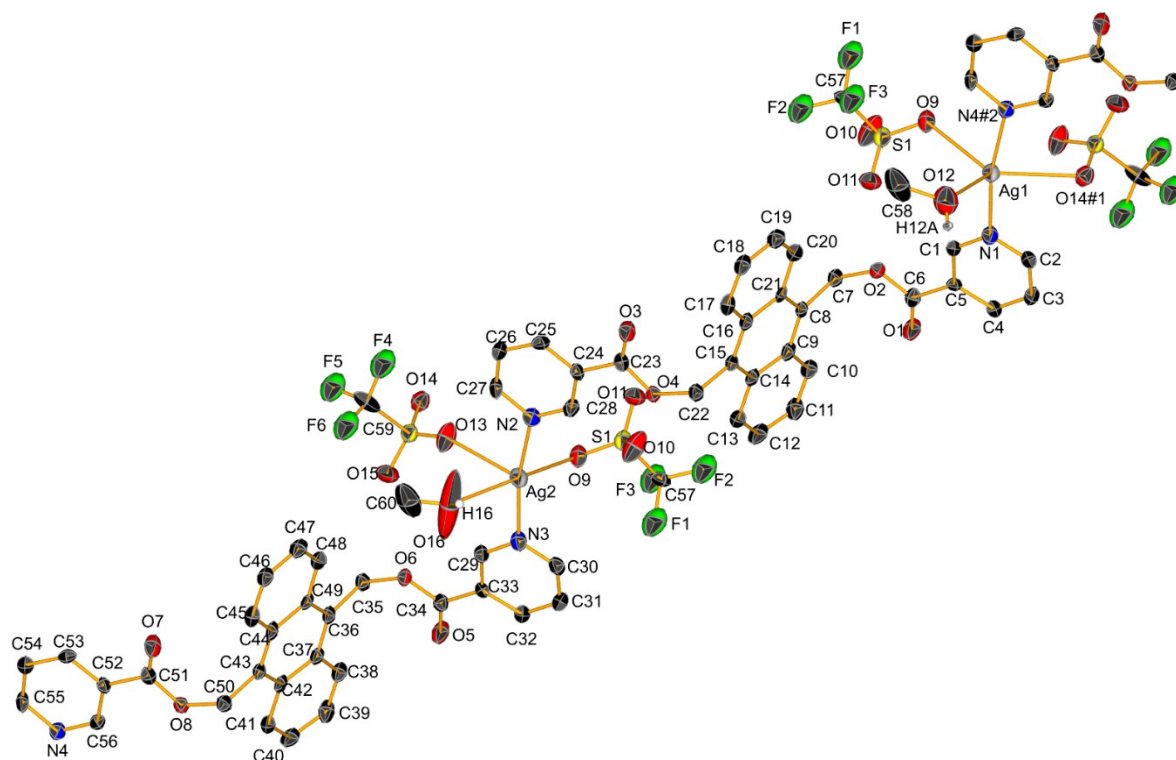

Fig S2: ORTEP plot of 2, ellipsoids draw at 50 % of probability; #1: 3-x, 2-y, 1-z; #2: -2+x, -2+y, -1+z; some H atoms are omitted for clarity.

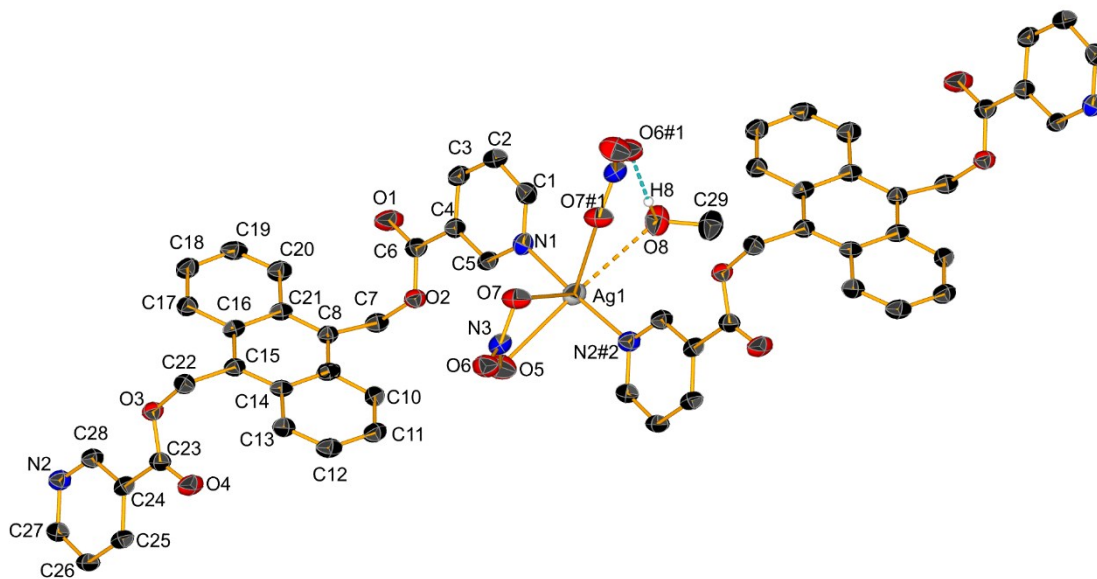

Fig S3: ORTEP plot of 3, ellipsoids draw at 50 % of probability; #1:  $-x, -y, 2-z$ ; #2:  $x, y, 1+z$ ; some H atoms are omitted for clarity.

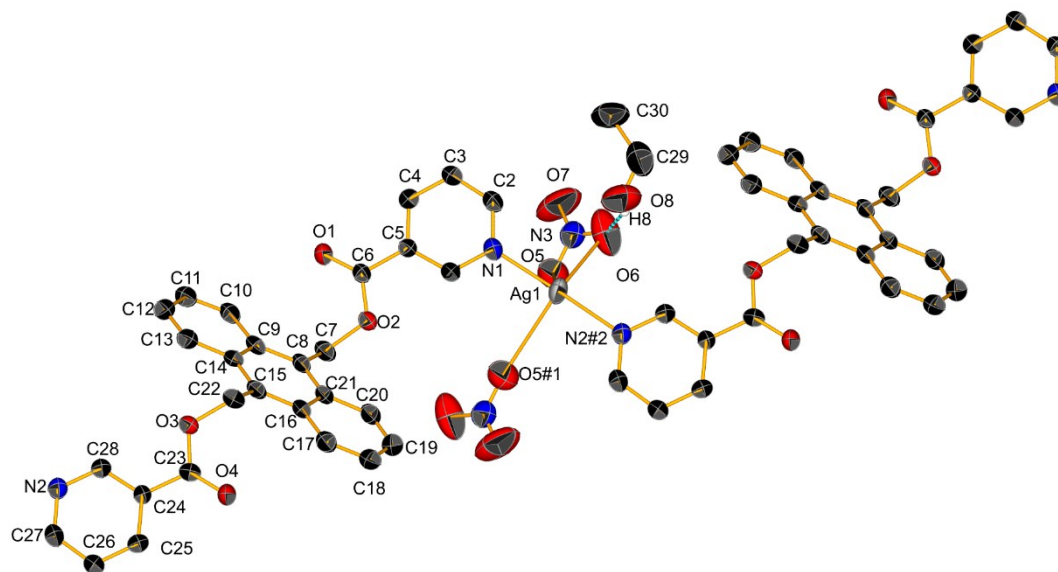

Fig S4: ORTEP plot of 4, ellipsoids draw at 35 % of probability; #1:  $1-x, -y, -z$ ; #2:  $-1+x, -1+y, -1+z$ ; some H atoms are omitted for clarity.

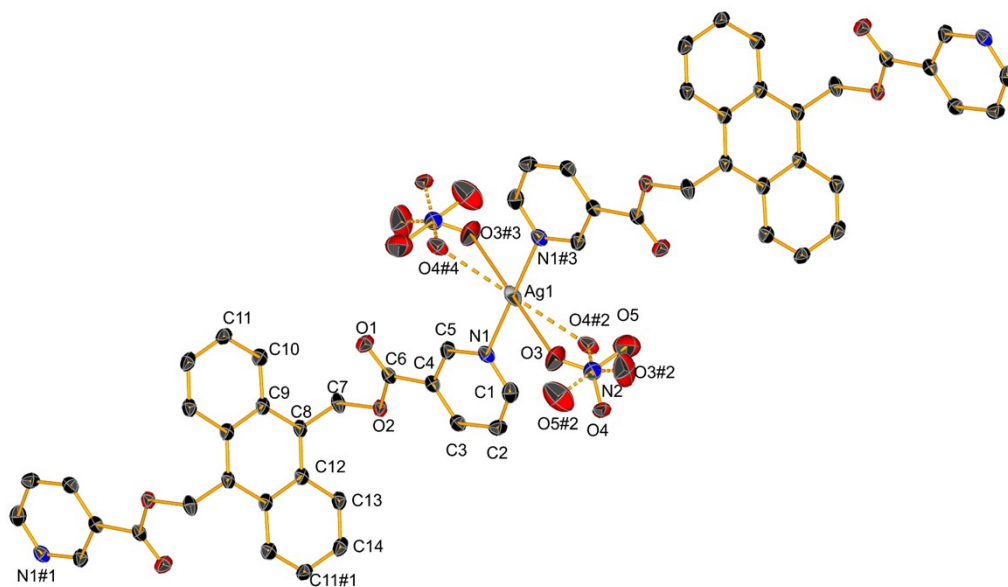

Fig S5: ORTEP plot of 5, ellipsoids draw at 35 % of probability; #1:  $1/2-x, -3/2-y, -z$ ; #2:  $1+x, y, 3/2-z$ ; #3:  $1-x, -y, 1-z$ , #4:  $x, -y, -1/2+z$ ; H atoms are omitted for clarity.

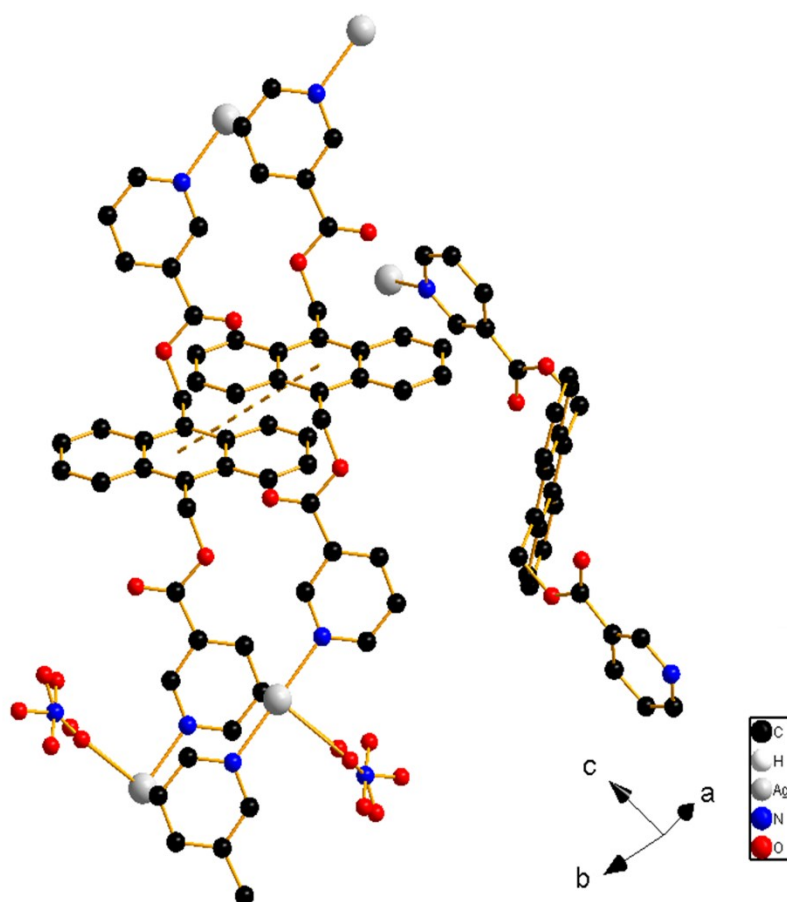

Fig S6. Packing in the crystal structure of 5; H atoms are omitted for clarity.

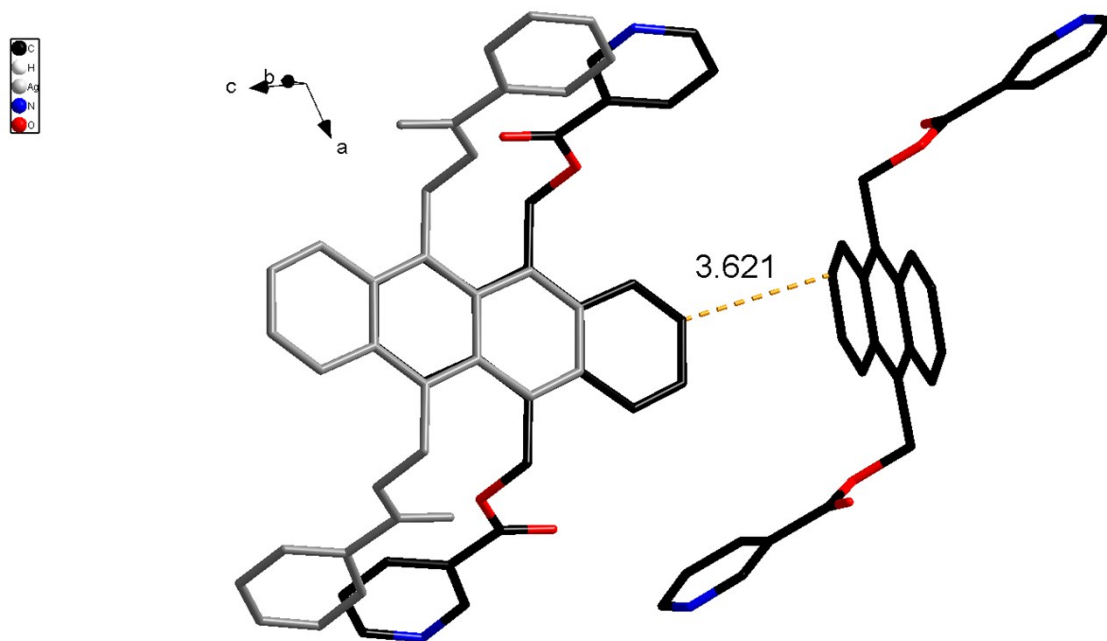

Fig S7. Packing in the crystal structure of **5** showing the weak interactions between adjacent anthracene moieties; H atoms are omitted for clarity.

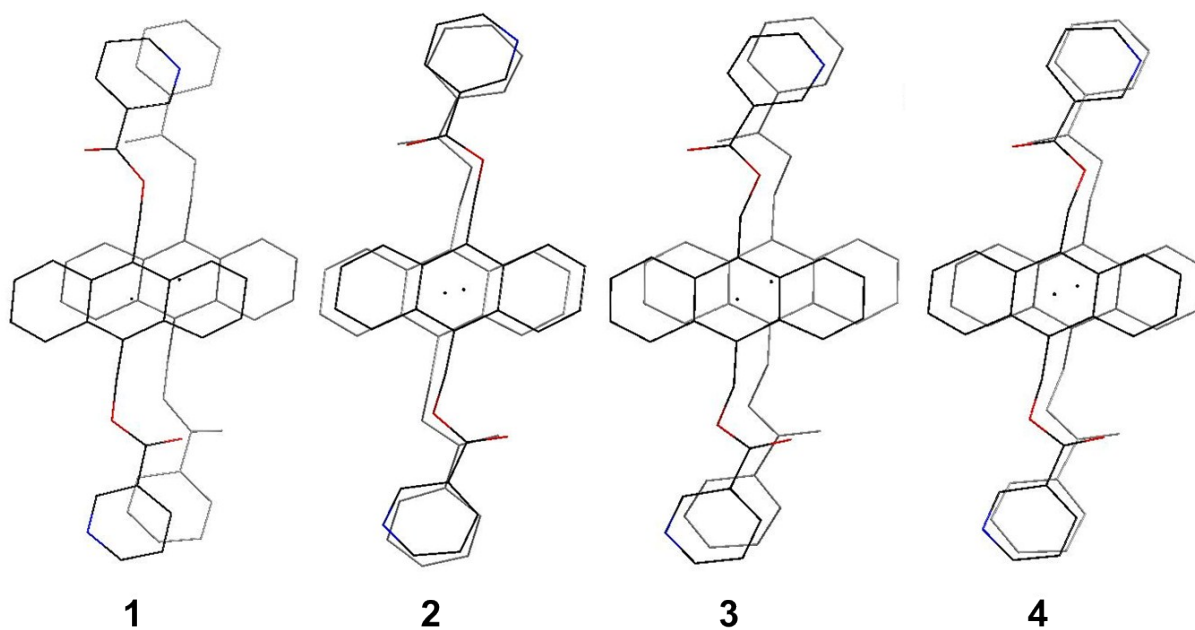

Fig S8. Upper view of the stacking in the crystal structure of **1** to **4** showing the overlays between adjacent anthracene moieties; Centroids are represented by the black point at the center of each anthracene; H atoms are omitted for clarity.
